# Supplementary material for: Systems Pharmacology Dissection of the Integrated Treatment for Cardiovascular and Gastrointestinal Disorders by Traditional Chinese Medicine
Source: PubMed Central journal article supplement (PMC5011655; doi:10.1038/srep32400), 2016-09-06
Supplement: srep32400-s1.pdf [file srep32400-s1.pdf]

# Systems-pharmacology dissection of the Integrated Treatment for Cardiovascular and Gastrointestinal Disorders by Traditional Chinese Medicine

Wenjuan Zhang<sup>1,2</sup>, Qin Tao<sup>1,2</sup>, Zihu Guo<sup>1,2</sup>, Yingxue Fu<sup>1,2</sup>, Xuotong Chen<sup>1,2</sup>, Piar Ali Shar<sup>1,2</sup>,  
Mohamed Shahan<sup>1,2</sup>, Jinglin Zhu<sup>3</sup>, Jun Xue<sup>3</sup>, Yaofei Bai<sup>1,2</sup>, Ziyin Wu<sup>1,2</sup>, Zhenzhong Wang<sup>4</sup>, Wei  
Xiao<sup>4\*</sup>, Yonghua Wang<sup>1,2\*</sup>

## Supplementary S1 Gene information associated with CVDs

| <b>Disease_name</b>             | <b>Gene_sympol</b> | <b>Gene_name</b>                                                                  |
|---------------------------------|--------------------|-----------------------------------------------------------------------------------|
| Heart Failure                   | PTI                | pancreatic trypsin inhibitor                                                      |
| Heart Septal Defects, Atrial    | PQBP1              | polyglutamine binding protein 1                                                   |
| Heart Defects, Congenital       | IRX5               | iroquois homeobox 5                                                               |
| Heart Septal Defects            | CITED2             | Cbp/p300-interacting transactivator, with Glu/Asp-rich carboxy-terminal domain, 2 |
| Heart Failure                   | FBLN5              | fibulin 5                                                                         |
| Cardiovascular Diseases         | CETP               | cholesteryl ester transfer protein, plasma                                        |
| Heart Failure                   | PPARGC1A           | peroxisome proliferator-activated receptor gamma, coactivator 1 alpha             |
| Heart Valve Diseases            | RIPK3              | receptor-interacting serine-threonine kinase 3                                    |
| Heart Diseases                  | ATP5K              | ATP synthase, H <sup>+</sup> transporting, mitochondrial F1F0 complex, subunit E  |
| Heart Diseases                  | ABCC2              | ATP-binding cassette, sub-family C (CFTR/MRP), member 2                           |
| Heart Diseases                  | HSPB6              | heat shock protein, alpha-crystallin-related, B6                                  |
| Heart Valve Diseases            | COL1A1             | collagen, type I, alpha 1                                                         |
| Heart Valve Diseases            | COL1A2             | collagen, type I, alpha 2                                                         |
| Conotruncal Heart Malformations | NKX2-6             | NK2 homeobox 6                                                                    |
| Cardiovascular Diseases         | CRP                | C-reactive protein, pentraxin-related                                             |
| Heart Diseases                  | CRP                | C-reactive protein, pentraxin-related                                             |
| Heart Failure                   | CRP                | C-reactive protein, pentraxin-related                                             |
| Heart Failure                   | CS                 | citrate synthase                                                                  |
| Heart Failure                   | CSF2               | colony stimulating factor 2 (granulocyte-macrophage)                              |
| Heart Failure                   | CSF3               | colony stimulating factor 3 (granulocyte)                                         |
| Heart Diseases                  | CSF3               | colony stimulating factor 3 (granulocyte)                                         |
| Heart Diseases                  | UNC45B             | unc-45 homolog B (C. elegans)                                                     |

|                                   |         |                                                                 |
|-----------------------------------|---------|-----------------------------------------------------------------|
| Cardiovascular Diseases           | CST3    | cystatin C                                                      |
| Heart Failure                     | CTGF    | connective tissue growth factor                                 |
| Heart Diseases                    | ADRA2A  | adrenoceptor alpha 2A                                           |
| Heart Failure                     | ADRA2C  | adrenoceptor alpha 2C                                           |
| Heart Failure                     | ADRB1   | adrenoceptor beta 1                                             |
| Cardiovascular Diseases           | ADRB1   | adrenoceptor beta 1                                             |
| Heart Diseases                    | CYBA    | cytochrome b-245, alpha polypeptide                             |
| Heart Failure                     | CYBB    | cytochrome b-245, beta polypeptide                              |
| Heart Failure                     | ADRB3   | adrenoceptor beta 3                                             |
| Cardiovascular Diseases           | CYP2C19 | cytochrome P450, family 2, subfamily C, polypeptide 19          |
| Heart Failure                     | ACE     | angiotensin I converting enzyme                                 |
| Cardiovascular Diseases           | ACE     | angiotensin I converting enzyme                                 |
| Heart Defects, Congenital         | JAG1    | jagged 1                                                        |
| Heart Defects, Congenital         | RCAN1   | regulator of calcineurin 1                                      |
| Heart Diseases                    | AGT     | angiotensinogen (serpin peptidase inhibitor, clade A, member 8) |
| Heart Failure                     | AGT     | angiotensinogen (serpin peptidase inhibitor, clade A, member 8) |
| Cardiovascular Diseases           | AGT     | angiotensinogen (serpin peptidase inhibitor, clade A, member 8) |
| Heart Failure                     | AGTR1   | angiotensin II receptor, type 1                                 |
| Heart Diseases                    | ABCB1A  | ATP-binding cassette, sub-family B (MDR/TAP), member 1A         |
| Heart Defects, Congenital         | ECE1    | endothelin converting enzyme 1                                  |
| Heart Failure                     | EDN1    | endothelin 1                                                    |
| Cardiovascular Diseases           | EDN1    | endothelin 1                                                    |
| Heart Defects, Congenital         | EDN1    | endothelin 1                                                    |
| Cardiovascular Abnormalities      | EDN1    | endothelin 1                                                    |
| Heart Defects, Congenital         | EDNRA   | endothelin receptor type A                                      |
| Heart Defects, Congenital         | AHR     | aryl hydrocarbon receptor                                       |
| Heart Valve Diseases              | CCL6    | chemokine (C-C motif) ligand 6                                  |
| Cardiovascular Abnormalities      | ANKS6   | ankyrin repeat and sterile alpha motif domain containing 6      |
| Heart Failure                     | EPHX2   | epoxide hydrolase 2, cytoplasmic                                |
| Heart Septal Defects, Ventricular | EPO     | erythropoietin                                                  |
| Heart Diseases                    | EPO     | erythropoietin                                                  |
| Heart Diseases                    | ALB     | albumin                                                         |
| Cardiovascular Diseases           | ALB     | albumin                                                         |
| Heart Failure                     | ALB     | albumin                                                         |
| Heart Defects, Congenital         | EYA1    | EYA transcriptional coactivator and phosphatase 1               |
| Heart Injuries                    | ALDH2   | aldehyde dehydrogenase 2 family (mitochondrial)                 |
| Heart Failure                     | TRP53   | transformation related protein 53                               |
| Heart Valve Diseases              | FCGR1A  | Fc fragment of IgG, high affinity Ia, receptor (CD64)           |
| Heart Failure                     | TUBB5   | tubulin, beta 5 class I                                         |
| Cardiovascular Abnormalities      | FGF8    | fibroblast growth factor 8 (androgen-induced)                   |
| Cardiovascular Abnormalities      | FOXC2   | forkhead box C2                                                 |
| Heart Diseases                    | SIRT1   | sirtuin 1                                                       |
| Heart Defects, Congenital         | FOLR1   | folate receptor 1 (adult)                                       |
| Heart Defects, Congenital         | NIPBL   | Nipped-B homolog (Drosophila)                                   |

|                                 |        |                                                                                                                 |
|---------------------------------|--------|-----------------------------------------------------------------------------------------------------------------|
| Heart Failure                   | GATM   | glycine amidinotransferase (L-arginine:glycine amidinotransferase)                                              |
| Heart Failure                   | GCG    | glucagon                                                                                                        |
| Heart Diseases                  | GCG    | glucagon                                                                                                        |
| Conotruncal Heart Malformations | GDF1   | growth differentiation factor 1                                                                                 |
| Heart Failure                   | MSTN   | myostatin                                                                                                       |
| Cardiovascular Diseases         | GH1    | growth hormone 1                                                                                                |
| Hypoplastic Left Heart Syndrome | GJA1   | gap junction protein, alpha 1, 43kDa                                                                            |
| Heart Failure                   | NOX1   | NADPH oxidase 1                                                                                                 |
| Heart Defects, Congenital       | AFF4   | AF4/FMR2 family, member 4                                                                                       |
| Heart Defects, Congenital       | GNA11  | guanine nucleotide binding protein (G protein), alpha 11 (Gq class)                                             |
| Heart Defects, Congenital       | GNAQ   | guanine nucleotide binding protein (G protein), q polypeptide                                                   |
| Heart Defects, Congenital       | GP1BB  | glycoprotein Ib (platelet), beta polypeptide                                                                    |
| Cardiovascular Diseases         | GPX1   | glutathione peroxidase 1                                                                                        |
| Heart Failure                   | GPX4   | glutathione peroxidase 4                                                                                        |
| Heart Valve Diseases            | PYCARD | PYD and CARD domain containing                                                                                  |
| Heart Failure                   | CXCL2  | chemokine (C-X-C motif) ligand 2                                                                                |
| Heart Failure                   | GSK3B  | glycogen synthase kinase 3 beta                                                                                 |
| Heart Diseases                  | HADHB  | hydroxyacyl-CoA dehydrogenase/3-ketoacyl-CoA thiolase/enoyl-CoA hydratase (trifunctional protein), beta subunit |
| Heart Diseases                  | AHR2   | aryl hydrocarbon receptor 2                                                                                     |
| Heart Diseases                  | HDAC1  | histone deacetylase 1                                                                                           |
| Heart Failure                   | NRG1   | neuregulin 1                                                                                                    |
| Heart Failure                   | HIF1A  | hypoxia inducible factor 1, alpha subunit (basic helix-loop-helix transcription factor)                         |
| Heart Failure                   | HMOX1  | heme oxygenase (decycling) 1                                                                                    |
| Heart Defects, Congenital       | HOXA1  | homeobox A1                                                                                                     |
| Heart Defects, Congenital       | HOXA3  | homeobox A3                                                                                                     |
| Cardiovascular Diseases         | HP     | haptoglobin                                                                                                     |
| Heart Failure                   | APCS   | amyloid P component, serum                                                                                      |
| Heart Diseases                  | APEX1  | APEX nuclease (multifunctional DNA repair enzyme) 1                                                             |
| Heart Failure                   | HSPB1  | heat shock 27kDa protein 1                                                                                      |
| Heart Valve Diseases            | HTR2B  | 5-hydroxytryptamine (serotonin) receptor 2B, G protein-coupled                                                  |
| Heart Failure                   | HTR2B  | 5-hydroxytryptamine (serotonin) receptor 2B, G protein-coupled                                                  |
| Cardiovascular Diseases         | APOB   | apolipoprotein B                                                                                                |
| Cardiovascular Diseases         | ICAM1  | intercellular adhesion molecule 1                                                                               |
| Cardiovascular Diseases         | APOC3  | apolipoprotein C-III                                                                                            |
| Heart Failure                   | IFNG   | interferon, gamma                                                                                               |
| Heart Arrest                    | IFNG   | interferon, gamma                                                                                               |
| Cardiovascular Diseases         | APOE   | apolipoprotein E                                                                                                |
| Heart Failure                   | IL1B   | interleukin 1, beta                                                                                             |
| Heart Valve Diseases            | IL1B   | interleukin 1, beta                                                                                             |
| Heart Failure                   | IL6    | interleukin 6                                                                                                   |
| Heart Valve Diseases            | IL18   | interleukin 18                                                                                                  |
| Heart Failure                   | INS    | insulin                                                                                                         |

|                                     |         |                                                                                              |
|-------------------------------------|---------|----------------------------------------------------------------------------------------------|
| Heart Arrest                        | INS     | insulin                                                                                      |
| Heart Failure                       | ITGB1   | integrin, beta 1 (fibronectin receptor, beta polypeptide, antigen CD29 includes MDF2, MSK12) |
| Heart Valve Diseases                | ITGB2   | integrin, beta 2 (complement component 3 receptor 3 and 4 subunit)                           |
| Heart Valve Diseases                | JAK2    | Janus kinase 2                                                                               |
| Heart Valve Diseases                | LCN2    | lipocalin 2                                                                                  |
| Heart Block                         | LMNA    | lamin A/C                                                                                    |
| Heart-Hand Syndrome, Slovenian Type | LMNA    | lamin A/C                                                                                    |
| Cardiovascular Diseases             | LPA     | lipoprotein, Lp(a)                                                                           |
| Cardiovascular Diseases             | LPL     | lipoprotein lipase                                                                           |
| Heart Valve Diseases                | LSP1    | lymphocyte-specific protein 1                                                                |
| Heart Diseases                      | MIR34A  | microRNA 34a                                                                                 |
| Heart Failure                       | NR3C2   | nuclear receptor subfamily 3, group C, member 2                                              |
| Cardiovascular Diseases             | MPO     | myeloperoxidase                                                                              |
| Heart Diseases                      | ABCC1   | ATP-binding cassette, sub-family C (CFTR/MRP), member 1                                      |
| Heart Diseases                      | MT2A    | metallothionein 2A                                                                           |
| Cardiovascular Diseases             | MTHFR   | methylenetetrahydrofolate reductase (NAD(P)H)                                                |
| Heart Defects, Congenital           | MTHFR   | methylenetetrahydrofolate reductase (NAD(P)H)                                                |
| Heart Septal Defects, Atrial        | MYH6    | myosin, heavy chain 6, cardiac muscle, alpha                                                 |
| Heart Injuries                      | MYL1    | myosin, light chain 1, alkali; skeletal, fast                                                |
| Heart Diseases                      | NCF4    | neutrophil cytosolic factor 4, 40kDa                                                         |
| Heart Failure                       | ATP1A3  | ATPase, Na <sup>+</sup> /K <sup>+</sup> transporting, alpha 3 polypeptide                    |
| Heart Failure                       | NOS2    | nitric oxide synthase 2, inducible                                                           |
| Cardiovascular Abnormalities        | NOS2    | nitric oxide synthase 2, inducible                                                           |
| Cardiovascular Diseases             | NOS3    | nitric oxide synthase 3 (endothelial cell)                                                   |
| Heart Failure                       | NOS3    | nitric oxide synthase 3 (endothelial cell)                                                   |
| Heart Valve Diseases                | NOTCH1  | notch 1                                                                                      |
| Heart Failure                       | ACHE    | acetylcholinesterase                                                                         |
| Atherosclerosis                     | AR      | androgen Receptor                                                                            |
| Cardiovascular Disease              | CYP2A6  | cytochrome P450 2A6                                                                          |
| Ischemia Reperfusion Injury         | ESR1    | estrogen receptor                                                                            |
| Diabetic Cardiomyopathy             | GLO1    | glyoxalase I                                                                                 |
| Heart Failure                       | MMP9    | matrix metalloproteinase 9                                                                   |
| Coronary Heart Disease              | NR3C1   | glucocorticoid receptor                                                                      |
| Atherosclerosis                     | PLA2G2A | phospholipase A2 group IIA                                                                   |
| Myocardial Infarction               | PLK2    | polo-Like Kinase 2                                                                           |
| Cardiovascular Diseases             | NPY     | neuropeptide Y                                                                               |
| Heart Failure                       | ATP2A1  | ATPase, Ca <sup>++</sup> transporting, cardiac muscle, fast twitch 1                         |
| Heart Failure                       | NPPA    | natriuretic peptide A                                                                        |
| Heart Diseases                      | NPPB    | natriuretic peptide B                                                                        |
| Cardiovascular Diseases             | NPPB    | natriuretic peptide B                                                                        |
| Heart Defects, Congenital           | NPPB    | natriuretic peptide B                                                                        |
| Heart Failure                       | NPPB    | natriuretic peptide B                                                                        |

---

|                |        |                                                                      |
|----------------|--------|----------------------------------------------------------------------|
| Heart Diseases | ATP2A2 | ATPase, Ca <sup>++</sup> transporting, cardiac muscle, slow twitch 2 |
| Heart Failure  | ATP2A2 | ATPase, Ca <sup>++</sup> transporting, cardiac muscle, slow twitch 2 |
| Heart Failure  | NPR1   | natriuretic peptide receptor 1                                       |

---

## Supplementary S2 Gene information associated with GIDs

| <b>Disease_name</b>         | <b>Gene_symbol</b> | <b>Gene_name</b>                                          |
|-----------------------------|--------------------|-----------------------------------------------------------|
| Stomach Neoplasms           | CDH2               | cadherin 2, type 1, N-cadherin (neuronal)                 |
| Stomach Neoplasms           | TRAP1              | TNF receptor-associated protein 1                         |
| Stomach Neoplasms           | EBI3               | epstein-Barr virus induced 3                              |
| Stomach Neoplasms           | CDK4               | cyclin-dependent kinase 4                                 |
| Stomach Neoplasms           | MSLN               | mesothelin                                                |
| Stomach Neoplasms           | CDKN1A             | cyclin-dependent kinase inhibitor 1A (p21, Cip1)          |
| Stomach Neoplasms           | CDKN1B             | cyclin-dependent kinase inhibitor 1B (p27, Kip1)          |
| Stomach Neoplasms           | CDKN2A             | cyclin-dependent kinase inhibitor 2A                      |
| Stomach Neoplasms           | CDKN2D             | cyclin-dependent kinase inhibitor 2D (p19, inhibits CDK4) |
| Stomach Neoplasms           | CNPY2              | canopy FGF signaling regulator 2                          |
| Stomach Neoplasms           | FST                | follistatin                                               |
| Stomach Neoplasms           | NOP56              | NOP56 ribonucleoprotein                                   |
| Stomach Neoplasms           | ARL6IP5            | ADP-ribosylation factor-like 6 interacting protein 5      |
| Stomach Neoplasms           | CCT7               | chaperonin containing TCP1, subunit 7 (eta)               |
| Stomach Neoplasms           | CTSC               | cathepsin C                                               |
| Stomach Neoplasms           | WIF1               | WNT inhibitory factor 1                                   |
| Stomach Neoplasms           | CHEK2              | checkpoint kinase 2                                       |
| Stomach Neoplasms           | CKB                | creatine kinase, brain                                    |
| Stomach Neoplasms           | LRRC3B             | leucine rich repeat containing 3B                         |
| Stomach Neoplasms           | CLCN3              | chloride channel, voltage-sensitive 3                     |
| Stomach Neoplasms           | CLN3               | ceroid-lipofuscinosis, neuronal 3                         |
| Stomach Neoplasms           | PLIN2              | perilipin 2                                               |
| Stomach Neoplasms           | MBD3L2             | methyl-CpG binding domain protein 3-like 2                |
| Stomach Neoplasms           | DCBLD2             | discoidin, CUB and LCCL domain containing 2               |
| Stomach Neoplasms           | KLF6               | kruppel-like factor 6                                     |
| Stomach Ulcer               | ADM                | adrenomedullin                                            |
| Stomach Neoplasms           | CLDN3              | claudin 3                                                 |
| Gastrointestinal Hemorrhage | CSF2               | colony stimulating factor 2 (granulocyte-macrophage)      |
| Gastrointestinal Diseases   | CSF3               | colony stimulating factor 3 (granulocyte)                 |
| Stomach Neoplasms           | CST1               | cystatin SN                                               |
| Stomach Neoplasms           | CTNNA2             | catenin (cadherin-associated protein), alpha 2            |
| Stomach Neoplasms           | CTSL               | cathepsin L                                               |
| Stomach Neoplasms           | ADRB1              | adrenoceptor beta 1                                       |
| Stomach Neoplasms           | ADRB2              | adrenoceptor beta 2, surface                              |
| Stomach Neoplasms           | CYP2A6             | cytochrome P450, family 2, subfamily A, polypeptide 6     |
| Stomach Neoplasms           | ACE                | angiotensin I converting enzyme                           |
| Stomach Neoplasms           | DDB1               | damage-specific DNA binding protein 1, 127kDa             |
| Stomach Neoplasms           | GADD45A            | growth arrest and DNA-damage-inducible, alpha             |

|                                 |          |                                                                                                                  |
|---------------------------------|----------|------------------------------------------------------------------------------------------------------------------|
| Stomach Neoplasms               | DES      | desmin                                                                                                           |
| Stomach Neoplasms               | AFP      | alpha-fetoprotein                                                                                                |
| Gastrointestinal Stromal Tumors | DMD      | dystrophin                                                                                                       |
| Stomach Neoplasms               | DNMT1    | DNA (cytosine-5-)-methyltransferase 1                                                                            |
| Stomach Neoplasms               | DNMT3B   | DNA (cytosine-5-)-methyltransferase 3 beta                                                                       |
| Stomach Neoplasms               | DPAGT1   | dolichyl-phosphate (UDP-N-acetylglucosamine)<br>N-acetylglucosaminephosphotransferase 1 (GlcNAc-1-P transferase) |
| Gastroesophageal Reflux         | ABAT     | 4-aminobutyrate aminotransferase                                                                                 |
| Stomach Neoplasms               | DPYD     | dihydropyrimidine dehydrogenase                                                                                  |
| Stomach Neoplasms               | HBEGF    | heparin-binding EGF-like growth factor                                                                           |
| Stomach Neoplasms               | AGTR2    | angiotensin II receptor, type 2                                                                                  |
| Stomach Neoplasms               | TYMP     | thymidine phosphorylase                                                                                          |
| Stomach Neoplasms               | ECHS1    | enoyl CoA hydratase, short chain, 1, mitochondrial                                                               |
| Gastrointestinal Diseases       | EDN1     | endothelin 1                                                                                                     |
| Stomach Neoplasms               | EEF1A1   | eukaryotic translation elongation factor 1 alpha 1                                                               |
| Stomach Neoplasms               | EEF1A2   | eukaryotic translation elongation factor 1 alpha 2                                                               |
| Stomach Ulcer                   | EGF      | epidermal growth factor                                                                                          |
| Stomach Neoplasms               | EGFR     | epidermal growth factor receptor                                                                                 |
| Stomach Neoplasms               | AHR      | aryl hydrocarbon receptor                                                                                        |
| Stomach Neoplasms               | REG1     | regenerating islet-derived 1                                                                                     |
| Stomach Neoplasms               | ENO1     | enolase 1, (alpha)                                                                                               |
| Stomach Neoplasms               | ERBB2    | erb-b2 receptor tyrosine kinase 2                                                                                |
| Gastrointestinal Neoplasms      | ERBB2    | erb-b2 receptor tyrosine kinase 2                                                                                |
| Stomach Neoplasms               | ERCC1    | excision repair cross-complementation group 1                                                                    |
| Stomach Neoplasms               | ERCC2    | excision repair cross-complementation group 2                                                                    |
| Stomach Neoplasms               | ALB      | albumin                                                                                                          |
| Stomach Neoplasms               | F2R      | coagulation factor II (thrombin) receptor                                                                        |
| Gastroenteritis                 | F2RL1    | coagulation factor II (thrombin) receptor-like 1                                                                 |
| Stomach Neoplasms               | ALDH1A3  | aldehyde dehydrogenase 1 family, member A3                                                                       |
| Stomach Neoplasms               | FBP1     | fructose-1,6-bisphosphatase 1                                                                                    |
| Stomach Neoplasms               | FGFR2    | fibroblast growth factor receptor 2                                                                              |
| Stomach Neoplasms               | FGG      | fibrinogen gamma chain                                                                                           |
| Stomach Neoplasms               | FHIT     | fragile histidine triad                                                                                          |
| Stomach Neoplasms               | FKBP2    | FK506 binding protein 2, 13kDa                                                                                   |
| Stomach Neoplasms               | ALDOB    | aldolase B, fructose-bisphosphate                                                                                |
| Stomach Neoplasms               | FAM168A  | family with sequence similarity 168, member A                                                                    |
| Stomach Neoplasms               | BOP1     | block of proliferation 1                                                                                         |
| Stomach Neoplasms               | ALOX5    | arachidonate 5-lipoxygenase                                                                                      |
| Stomach Neoplasms               | ATP6V0D2 | ATPase, H <sup>+</sup> transporting, lysosomal 38kDa, V0 subunit d2                                              |
| Gastrointestinal Diseases       | GAST     | gastrin                                                                                                          |
| Stomach Neoplasms               | GAST     | gastrin                                                                                                          |
| Stomach Neoplasms               | FYN      | FYN proto-oncogene, Src family tyrosine kinase                                                                   |
| Stomach Neoplasms               | PRDX5    | peroxiredoxin 5                                                                                                  |

|                            |         |                                                                |
|----------------------------|---------|----------------------------------------------------------------|
| Stomach Neoplasms          | SERBP1  | SERPINE1 mRNA binding protein 1                                |
| Stomach Neoplasms          | ZBTB20  | zinc finger and BTB domain containing 20                       |
| Stomach Diseases           | GCG     | glucagon                                                       |
| Stomach Neoplasms          | GREM1   | gremlin 1, DAN family BMP antagonist                           |
| Stomach Neoplasms          | ACAD8   | acyl-CoA dehydrogenase family, member 8                        |
| Stomach Neoplasms          | SNX5    | sorting nexin 5                                                |
| Stomach Neoplasms          | FILIP1  | filamin A interacting protein 1                                |
| Stomach Neoplasms          | PRPF19  | pre-mRNA processing factor 19                                  |
| Stomach Neoplasms          | GLI3    | GLI family zinc finger 3                                       |
| Stomach Neoplasms          | MRPS18B | mitochondrial ribosomal protein S18B                           |
| Stomach Neoplasms          | MRPL13  | mitochondrial ribosomal protein L13                            |
| Stomach Neoplasms          | PYCARD  | PYD and CARD domain containing                                 |
| Stomach Neoplasms          | GSTP1   | glutathione S-transferase pi 1                                 |
| Stomach Neoplasms          | ABT1    | activator of basal transcription 1                             |
| Stomach Neoplasms          | CPSF1   | cleavage and polyadenylation specific factor 1, 160kDa         |
| Stomach Diseases           | ANXA1   | annexin A1                                                     |
| Stomach Neoplasms          | ANXA5   | annexin A5                                                     |
| Stomach Ulcer              | NRG1    | neuregulin 1                                                   |
| Gastrointestinal Neoplasms | HIC1    | hypermethylated in cancer 1                                    |
| Stomach Neoplasms          | HMOX1   | heme oxygenase (decycling) 1                                   |
| Gastroparesis              | HMOX1   | heme oxygenase (decycling) 1                                   |
| Stomach Neoplasms          | HNRNPL  | heterogeneous nuclear ribonucleoprotein L                      |
| Stomach Neoplasms          | HOXA2   | homeobox A2                                                    |
| Stomach Neoplasms          | APC     | adenomatous polyposis coli                                     |
| Stomach Tumor              | ACHE    | acetylcholinesterase                                           |
| Gastric Cancer             | AR      | androgen Receptor                                              |
| Gastric Carcinoma          | CYP2A6  | aytochrome P450 2A6                                            |
| Gastric Cancer             | ESR1    | estrogen Receptor                                              |
| Gastric Cancer             | GLO1    | glyoxalase I                                                   |
| Gastric Carcinoma          | MMP9    | matrix metalloproteinase 9                                     |
| Gastric Cancer             | NR3C1   | glucocorticoid receptor                                        |
| Gastric Cancer             | PLA2G2A | phospholipase A2 group IIA                                     |
| Stomach Tumor              | PLK2    | polo-Like Kinase 2                                             |
| Gastrointestinal Neoplasms | APC     | adenomatous polyposis coli                                     |
| Stomach Neoplasms          | HRAS    | harvey rat sarcoma viral oncogene homolog                      |
| Stomach Neoplasms          | APEX1   | APEX nuclease (multifunctional DNA repair enzyme) 1            |
| Stomach Neoplasms          | BIRC2   | baculoviral IAP repeat containing 2                            |
| Stomach Neoplasms          | HSPA8   | heat shock 70kDa protein 8                                     |
| Stomach Neoplasms          | HSPB1   | heat shock 27kDa protein 1                                     |
| Stomach Neoplasms          | BIRC5   | baculoviral IAP repeat containing 5                            |
| Stomach Neoplasms          | HSPD1   | heat shock 60kDa protein 1 (chaperonin)                        |
| Stomach Neoplasms          | APOA1   | apolipoprotein A-I                                             |
| Stomach Neoplasms          | HTR1A   | 5-hydroxytryptamine (serotonin) receptor 1A, G protein-coupled |
| Stomach Ulcer              | IAPP    | islet amyloid polypeptide                                      |

|                                 |         |                                                                        |
|---------------------------------|---------|------------------------------------------------------------------------|
| Stomach Neoplasms               | ICAM2   | intercellular adhesion molecule 2                                      |
| Stomach Neoplasms               | ID4     | inhibitor of DNA binding 4, dominant negative helix-loop-helix protein |
| Stomach Neoplasms               | IDH3B   | isocitrate dehydrogenase 3 (NAD+) beta                                 |
| Stomach Neoplasms               | IGFBP3  | insulin-like growth factor binding protein 3                           |
| Stomach Neoplasms               | IGFBP7  | insulin-like growth factor binding protein 7                           |
| Stomach Ulcer                   | IL1B    | interleukin 1, beta                                                    |
| Stomach Neoplasms               | IL1B    | interleukin 1, beta                                                    |
| Gastritis, Atrophic             | IL1B    | interleukin 1, beta                                                    |
| Stomach Neoplasms               | IL1RN   | interleukin 1 receptor antagonist                                      |
| Stomach Neoplasms               | IL6     | interleukin 6                                                          |
| Stomach Neoplasms               | IL6R    | interleukin 6 receptor                                                 |
| Gastroesophageal Reflux         | CXCL8   | chemokine (C-X-C motif) ligand 8                                       |
| Stomach Neoplasms               | CXCL8   | chemokine (C-X-C motif) ligand 8                                       |
| Stomach Neoplasms               | TNFRSF9 | tumor necrosis factor receptor superfamily, member 9                   |
| Stomach Neoplasms               | ING1    | inhibitor of growth family, member 1                                   |
| Stomach Neoplasms               | IRF1    | interferon regulatory factor 1                                         |
| Stomach Neoplasms               | ITGA5   | integrin, alpha 5 (fibronectin receptor, alpha polypeptide)            |
| Stomach Neoplasms               | JUN     | jun proto-oncogene                                                     |
| Stomach Neoplasms               | AREG    | amphiregulin                                                           |
| Stomach Neoplasms               | KISS1   | KiSS-1 metastasis-suppressor                                           |
| Gastrointestinal Stromal Tumors | KIT     | v-kit Hardy-Zuckerman 4 feline sarcoma viral oncogene homolog          |
| Stomach Neoplasms               | KRAS    | Kirsten rat sarcoma viral oncogene homolog                             |
| Stomach Neoplasms               | KRT8    | keratin 8, type II                                                     |
| Stomach Neoplasms               | RHOA    | ras homolog family member A                                            |
| Stomach Ulcer                   | LEP     | leptin                                                                 |
| Stomach Neoplasms               | LGALS3  | lectin, galactoside-binding, soluble, 3                                |
| Stomach Neoplasms               | FADS1   | fatty acid desaturase 1                                                |
| Gastrointestinal Hemorrhage     | LTF     | lactotransferrin                                                       |
| Stomach Neoplasms               | M6PR    | mannose-6-phosphate receptor (cation dependent)                        |
| Stomach Neoplasms               | SMAD4   | SMAD family member 4                                                   |
| Stomach Neoplasms               | MARK1   | MAP/microtubule affinity-regulating kinase 1                           |
| Gastrinoma                      | MEN1    | multiple endocrine neoplasia I                                         |
| Stomach Neoplasms               | MET     | MET proto-oncogene, receptor tyrosine kinase                           |
| Stomach Neoplasms               | MLF1    | myeloid leukemia factor 1                                              |
| Stomach Neoplasms               | KMT2A   | lysine (K)-specific methyltransferase 2A                               |
| Stomach Ulcer                   | MMP9    | matrix metalloproteinase 9                                             |
| Stomach Neoplasms               | MMP10   | matrix metalloproteinase 10                                            |
| Stomach Neoplasms               | MSX1    | msh homeobox 1                                                         |
| Stomach Neoplasms               | MT2A    | metallothionein 2A                                                     |
| Stomach Neoplasms               | MTHFR   | methylenetetrahydrofolate reductase (NAD(P)H)                          |
| Gastrointestinal Diseases       | MTR     | 5-methyltetrahydrofolate-homocysteine methyltransferase                |
| Stomach Neoplasms               | MUC6    | mucin 6, oligomeric mucus/gel-forming                                  |

|                                 |          |                                                                                               |
|---------------------------------|----------|-----------------------------------------------------------------------------------------------|
| Stomach Neoplasms               | MUTYH    | mutY homolog                                                                                  |
| Stomach Neoplasms               | MX1      | MX dynamin-like GTPase 1                                                                      |
| Stomach Neoplasms               | MYC      | v-myc avian myelocytomatosis viral oncogene homolog                                           |
| Gastrointestinal Diseases       | MYLK     | myosin light chain kinase                                                                     |
| Stomach Neoplasms               | NDUFA2   | NADH dehydrogenase (ubiquinone) 1 alpha subcomplex, 2, 8kDa                                   |
| Stomach Neoplasms               | NDUFS1   | NADH dehydrogenase (ubiquinone) Fe-S protein 1, 75kDa (NADH-coenzyme Q reductase)             |
| Stomach Neoplasms               | NDUFV1   | NADH dehydrogenase (ubiquinone) flavoprotein 1, 51kDa                                         |
| Gastrointestinal Diseases       | NFE2L2   | nuclear factor, erythroid 2-like 2                                                            |
| Stomach Ulcer                   | NOS2     | nitric oxide synthase 2, inducible                                                            |
| Stomach Ulcer                   | NOS3     | nitric oxide synthase 3 (endothelial cell)                                                    |
| Stomach Neoplasms               | NOS3     | nitric oxide synthase 3 (endothelial cell)                                                    |
| Stomach Neoplasms               | NPM1     | nucleophosmin (nucleolar phosphoprotein B23, numatrin)                                        |
| Stomach Neoplasms               | NT5E     | 5'-nucleotidase, ecto (CD73)                                                                  |
| Stomach Neoplasms               | ALDH7A1  | aldehyde dehydrogenase 7 family, member A1                                                    |
| Stomach Neoplasms               | PA2G4    | proliferation-associated 2G4, 38kDa                                                           |
| Stomach Neoplasms               | SERPINE1 | serpin peptidase inhibitor, clade E (nexin, plasminogen activator inhibitor type 1), member 1 |
| Stomach Neoplasms               | SERPINB2 | serpin peptidase inhibitor, clade B (ovalbumin), member 2                                     |
| Stomach Neoplasms               | PAX6     | paired box 6                                                                                  |
| Stomach Neoplasms               | COPS7A   | COP9 signalosome subunit 7A                                                                   |
| Stomach Neoplasms               | UBXN1    | UBX domain protein 1                                                                          |
| Stomach Neoplasms               | ZNF593   | zinc finger protein 593                                                                       |
| Stomach Neoplasms               | PLCE1    | phospholipase C, epsilon 1                                                                    |
| Stomach Neoplasms               | GMPR2    | guanosine monophosphate reductase 2                                                           |
| Stomach Neoplasms               | C11ORF73 | chromosome 11 open reading frame 73                                                           |
| Gastrointestinal Stromal Tumors | PDGFRA   | platelet-derived growth factor receptor, alpha polypeptide                                    |
| Stomach Neoplasms               | NBAS     | neuroblastoma amplified sequence                                                              |
| Stomach Neoplasms               | PDHA1    | pyruvate dehydrogenase (lipoamide) alpha 1                                                    |
| Stomach Neoplasms               | POLR3K   | polymerase (RNA) III (DNA directed) polypeptide K, 12.3 kDa                                   |
| Stomach Ulcer                   | GHRL     | ghrelin/obestatin prepropeptide                                                               |
| Stomach Neoplasms               | WWOX     | WW domain containing oxidoreductase                                                           |
| Stomach Neoplasms               | PGAM1    | phosphoglycerate mutase 1 (brain)                                                             |
| Stomach Neoplasms               | PHB      | prohibitin                                                                                    |
| Stomach Neoplasms               | SERPINA1 | serpin peptidase inhibitor, clade A (alpha-1 antitrypsin), member 1                           |
| Stomach Neoplasms               | PIK3CA   | phosphatidylinositol-4,5-bisphosphate 3-kinase, catalytic subunit alpha                       |
| Stomach Neoplasms               | PLAGL1   | pleiomorphic adenoma gene-like 1                                                              |
| Stomach Neoplasms               | PLAU     | plasminogen activator, urokinase                                                              |
| Stomach Neoplasms               | PTOV1    | prostate tumor overexpressed 1                                                                |
| Gastrointestinal Diseases       | POMC     | proopiomelanocortin                                                                           |
| Stomach Neoplasms               | KRT20    | keratin 20, type I                                                                            |
| Stomach Neoplasms               | PPARG    | peroxisome proliferator-activated receptor gamma                                              |

|                             |              |                                                                                       |
|-----------------------------|--------------|---------------------------------------------------------------------------------------|
| Stomach Neoplasms           | XAF1         | XIAP associated factor 1                                                              |
| Stomach Neoplasms           | PPIA         | peptidylprolyl isomerase A (cyclophilin A)                                            |
| Stomach Neoplasms           | PPIC         | peptidylprolyl isomerase C (cyclophilin C)                                            |
| Stomach Neoplasms           | RNF43        | ring finger protein 43                                                                |
| Gastrointestinal Hemorrhage | AVP          | arginine vasopressin                                                                  |
| Stomach Neoplasms           | PPP2R1A      | protein phosphatase 2, regulatory subunit A, alpha                                    |
| Stomach Neoplasms           | PPP2R4       | protein phosphatase 2A activator, regulatory subunit 4                                |
| Stomach Neoplasms           | PRR5-ARHGAP8 | PRR5-ARHGAP8 readthrough                                                              |
| Stomach Neoplasms           | PREP         | prolyl endopeptidase                                                                  |
| Stomach Neoplasms           | PRKAB1       | protein kinase, AMP-activated, beta 1 non-catalytic subunit                           |
| Stomach Neoplasms           | CARKD        | carbohydrate kinase domain containing                                                 |
| Stomach Neoplasms           | CHFR         | checkpoint with forkhead and ring finger domains, E3 ubiquitin protein ligase         |
| Stomach Neoplasms           | PRKCB        | protein kinase C, beta                                                                |
| Stomach Neoplasms           | MAPK1        | mitogen-activated protein kinase 1                                                    |
| Stomach Neoplasms           | MAPK3        | mitogen-activated protein kinase 3                                                    |
| Stomach Neoplasms           | MAPK8        | mitogen-activated protein kinase 8                                                    |
| Stomach Neoplasms           | PRNP         | prion protein                                                                         |
| Stomach Neoplasms           | GKN1         | gastrokine 1                                                                          |
| Stomach Neoplasms           | KLK10        | kallikrein-related peptidase 10                                                       |
| Stomach Neoplasms           | EXOSC5       | exosome component 5                                                                   |
| Stomach Ulcer               | PTGS1        | prostaglandin-endoperoxide synthase 1 (prostaglandin G/H synthase and cyclooxygenase) |
| Stomach Ulcer               | PTGS2        | prostaglandin-endoperoxide synthase 2 (prostaglandin G/H synthase and cyclooxygenase) |
| Stomach Neoplasms           | PTGS2        | prostaglandin-endoperoxide synthase 2 (prostaglandin G/H synthase and cyclooxygenase) |
| Gastroesophageal Reflux     | PTGS2        | prostaglandin-endoperoxide synthase 2 (prostaglandin G/H synthase and cyclooxygenase) |
| Stomach Neoplasms           | RANBP10      | RAN binding protein 10                                                                |
| Gastrointestinal Diseases   | CHD8         | chromodomain helicase DNA binding protein 8                                           |
| Stomach Neoplasms           | PTPRF        | protein tyrosine phosphatase, receptor type, F                                        |
| Stomach Neoplasms           | PTPRG        | protein tyrosine phosphatase, receptor type, G                                        |
| Stomach Neoplasms           | KMT2C        | lysine (K)-specific methyltransferase 2C                                              |
| Stomach Neoplasms           | RAD23A       | RAD23 homolog A ( <i>S. cerevisiae</i> )                                              |
| Stomach Neoplasms           | RARB         | retinoic acid receptor, beta                                                          |
| Stomach Neoplasms           | RARRES1      | retinoic acid receptor responder (tazarotene induced) 1                               |
| Gastroesophageal Reflux     | GER          | Gastroesophageal reflux                                                               |
| Stomach Neoplasms           | HRH4         | histamine receptor H4                                                                 |
| Stomach Neoplasms           | RBP1         | retinol binding protein 1, cellular                                                   |
| Stomach Neoplasms           | CCND1        | cyclin D1                                                                             |
| Stomach Neoplasms           | RBP4         | retinol binding protein 4, plasma                                                     |
| Stomach Neoplasms           | RGS2         | regulator of G-protein signaling 2                                                    |

|                                   |        |                                                                                  |
|-----------------------------------|--------|----------------------------------------------------------------------------------|
| Stomach Neoplasms                 | RORA   | RAR-related orphan receptor A                                                    |
| Stomach Neoplasms                 | RPL13  | ribosomal protein L13                                                            |
| Stomach Neoplasms                 | RPL15  | ribosomal protein L15                                                            |
| Stomach Neoplasms                 | RPL18  | ribosomal protein L18                                                            |
| Stomach Neoplasms                 | RPS6   | ribosomal protein S6                                                             |
| Stomach Neoplasms                 | RPS15  | ribosomal protein S15                                                            |
| Stomach Neoplasms                 | RPS19  | ribosomal protein S19                                                            |
| Stomach Neoplasms                 | RPS21  | ribosomal protein S21                                                            |
| Stomach Neoplasms                 | RPS26  | ribosomal protein S26                                                            |
| Stomach Neoplasms                 | RXRB   | retinoid X receptor, beta                                                        |
| Stomach Neoplasms                 | BDNF   | brain-derived neurotrophic factor                                                |
| Stomach Neoplasms                 | BID    | BH3 interacting domain death agonist                                             |
| Stomach Neoplasms                 | BLVRB  | biliverdin reductase B                                                           |
| Stomach Neoplasms                 | MRPS11 | mitochondrial ribosomal protein S11                                              |
| Stomach Neoplasms                 | BMP2   | bone morphogenetic protein 2                                                     |
| Stomach Neoplasms                 | SLC1A2 | solute carrier family 1 (glial high affinity glutamate transporter), member 2    |
| Stomach Neoplasms                 | BMP7   | bone morphogenetic protein 7                                                     |
| Stomach Neoplasms                 | SNAI1  | snail family zinc finger 1                                                       |
| Stomach Neoplasms                 | SNRPB  | small nuclear ribonucleoprotein polypeptides B and B1                            |
| Stomach Neoplasms                 | BNIP3  | BCL2/adenovirus E1B 19kDa interacting protein 3                                  |
| Stomach Neoplasms                 | SOD2   | superoxide dismutase 2, mitochondrial                                            |
| Stomach Neoplasms                 | SPRR2A | small proline-rich protein 2A                                                    |
| Stomach Neoplasms                 | SREBF2 | sterol regulatory element binding transcription factor 2                         |
| Esophageal and Gastric<br>Varices | SST    | somatostatin                                                                     |
| Stomach Neoplasms                 | STAT3  | signal transducer and activator of transcription 3 (acute-phase response factor) |
| Gastroesophageal Reflux           | TAC1   | tachykinin, precursor 1                                                          |
| Stomach Neoplasms                 | TBX3   | T-box 3                                                                          |
| Stomach Neoplasms                 | ACTC1  | actin, alpha, cardiac muscle 1                                                   |
| Stomach Neoplasms                 | TFAP2C | transcription factor AP-2 gamma (activating enhancer binding protein 2 gamma)    |
| Stomach Neoplasms                 | TGFA   | transforming growth factor, alpha                                                |
| Stomach Neoplasms                 | THBD   | thrombomodulin                                                                   |
| Stomach Neoplasms                 | TIMP3  | TIMP metalloproteinase inhibitor 3                                               |
| Stomach Ulcer                     | TNF    | tumor necrosis factor                                                            |
| Stomach Neoplasms                 | TNF    | tumor necrosis factor                                                            |
| Stomach Neoplasms                 | TP53   | tumor protein p53                                                                |
| Stomach Neoplasms                 | TPM3   | tropomyosin 3                                                                    |
| Stomach Neoplasms                 | TWIST1 | twist family bHLH transcription factor 1                                         |
| Stomach Neoplasms                 | TYMS   | thymidylate synthetase                                                           |
| Stomach Neoplasms                 | UMPS   | uridine monophosphate synthetase                                                 |
| Stomach Ulcer                     | VEGFA  | vascular endothelial growth factor A                                             |
| Stomach Ulcer                     | VGF    | VGF nerve growth factor inducible                                                |

|                                 |          |                                                                                       |
|---------------------------------|----------|---------------------------------------------------------------------------------------|
| Stomach Neoplasms               | XRCC1    | X-ray repair complementing defective repair in Chinese hamster cells 1                |
| Stomach Neoplasms               | XRCC3    | X-ray repair complementing defective repair in Chinese hamster cells 3                |
| Stomach Neoplasms               | CA1      | carbonic anhydrase I                                                                  |
| Stomach Neoplasms               | CA2      | carbonic anhydrase II                                                                 |
| Stomach Neoplasms               | ZNF177   | zinc finger protein 177                                                               |
| Stomach Neoplasms               | FSD1     | fibronectin type III and SPRY domain containing 1                                     |
| Stomach Neoplasms               | FAT4     | FAT atypical cadherin 4                                                               |
| Stomach Neoplasms               | EPHX3    | epoxide hydrolase 3                                                                   |
| Stomach Neoplasms               | PSCA     | prostate stem cell antigen                                                            |
| Gastric Antral Vascular Ectasia | CTC1     | CTS telomere maintenance complex component 1                                          |
| Stomach Neoplasms               | PUS1     | pseudouridylate synthase 1                                                            |
| Stomach Neoplasms               | ULBP2    | UL16 binding protein 2                                                                |
| Stomach Neoplasms               | TAF15    | TAF15 RNA polymerase II, TATA box binding protein (TBP)-associated factor, 68kDa      |
| Stomach Neoplasms               | URM1     | ubiquitin related modifier 1                                                          |
| Stomach Neoplasms               | SYMPK    | symplekin                                                                             |
| Stomach Neoplasms               | MIA      | melanoma inhibitory activity                                                          |
| Stomach Neoplasms               | ARID1A   | AT rich interactive domain 1A (SWI-like)                                              |
| Stomach Neoplasms               | REG4     | regenerating islet-derived family, member 4                                           |
| Stomach Neoplasms               | CASP8    | caspase 8, apoptosis-related cysteine peptidase                                       |
| Stomach Neoplasms               | CASP10   | caspase 10, apoptosis-related cysteine peptidase                                      |
| Stomach Neoplasms               | ARFGAP2  | ADP-ribosylation factor GTPase activating protein 2                                   |
| Stomach Neoplasms               | ZNF559   | zinc finger protein 559                                                               |
| Stomach Neoplasms               | KISS1R   | KISS1 receptor                                                                        |
| Stomach Neoplasms               | SPZ1     | spermatogenic leucine zipper 1                                                        |
| Stomach Ulcer                   | CAT      | catalase                                                                              |
| Stomach Neoplasms               | TUBA1C   | tubulin, alpha 1c                                                                     |
| Stomach Neoplasms               | ITGA8    | integrin, alpha 8                                                                     |
| Stomach Neoplasms               | CST7     | cystatin F (leukocystatin)                                                            |
| Stomach Neoplasms               | CAV1     | caveolin 1, caveolae protein, 22kDa                                                   |
| Stomach Neoplasms               | PPAP2A   | phosphatidic acid phosphatase type 2A                                                 |
| Stomach Neoplasms               | RUNX3    | runt-related transcription factor 3                                                   |
| Stomach Neoplasms               | AKR1C3   | aldo-keto reductase family 1, member C3                                               |
| Stomach Neoplasms               | IRS2     | insulin receptor substrate 2                                                          |
| Stomach Neoplasms               | TNFSF9   | tumor necrosis factor (ligand) superfamily, member 9                                  |
| Stomach Neoplasms               | SUCLG1   | succinate-CoA ligase, alpha subunit                                                   |
| Stomach Ulcer                   | CCK      | cholecystokinin                                                                       |
| Gastrointestinal Diseases       | CCK      | cholecystokinin                                                                       |
| Stomach Neoplasms               | FCGBP    | Fc fragment of IgG binding protein                                                    |
| Stomach Neoplasms               | SELENBP1 | selenium binding protein 1                                                            |
| Stomach Neoplasms               | ZNF160   | zinc finger protein 160                                                               |
| Stomach Neoplasms               | RRP9     | ribosomal RNA processing 9, small subunit (SSU) processome component, homolog (yeast) |

---

|                            |         |                                             |
|----------------------------|---------|---------------------------------------------|
| Stomach Neoplasms          | AURKB   | aurora kinase B                             |
| Stomach Neoplasms          | IL32    | interleukin 32                              |
| Stomach Neoplasms          | WDR46   | WD repeat domain 46                         |
| Gastrointestinal Neoplasms | GDF15   | growth differentiation factor 15            |
| Stomach Neoplasms          | CD44    | CD44 molecule (Indian blood group)          |
| Stomach Neoplasms          | TMEM63A | transmembrane protein 63A                   |
| Stomach Neoplasms          | MTSS1   | metastasis suppressor 1                     |
| Stomach Neoplasms          | SCRN1   | secernin 1                                  |
| Gastrointestinal Diseases  | KEAP1   | kelch-like ECH-associated protein 1         |
| Stomach Neoplasms          | CDH1    | cadherin 1, type 1, E-cadherin (epithelial) |
| Stomach Neoplasms          | CDH2    | cadherin 2, type 1, N-cadherin (neuronal)   |

---

### Supplementary S3 Herbs belonged to heart meridian

| Herb Name                                                 | Pinyin       | Meridian                              | Property and Flavor                 |
|-----------------------------------------------------------|--------------|---------------------------------------|-------------------------------------|
| <i>Acanthopanax Senticosi Radix Et Rhizoma Seu Caulis</i> | Ciwujia      | spleen, kidney, heart                 | pungent, little bitter, temperature |
| <i>Aconiti Radix</i>                                      | Chuanwu      | heart, liver, kidney, spleen          | pungent, bitter, hot, large toxic   |
| <i>Aconiti Kusnezoffii Radix</i>                          | Caowu        | heart, liver, kidney, spleen          | pungent, bitter, hot, large toxic   |
| <i>Aconiti Kusnezoffii Radix Cocta</i>                    | Zhicaowu     | heart, liver, kidney, spleen          | pungent, bitter, hot, toxic         |
| <i>Aconiti Lateralis Radix Praeparata</i>                 | Fuzi         | heart, kidney, spleen                 | pungent, sweet, large hot, toxic    |
| <i>Aconiti Radix Cocta</i>                                | Zhichaunwu   | heart, liver, kidney, spleen          | pungent, bitter, hot, toxic         |
| <i>Acori Tatarinowii Rhizoma</i>                          | Shichangpu   | heart, stomach                        | pungent, bitter, temperature        |
| <i>Agrimoniae Herba</i>                                   | Xianhecao    | heart, liver                          | bitter, astringent, natured         |
| <i>Akebiae Caulis</i>                                     | Mutong       | heart, small intestine, bladder       | bitter, cold                        |
| <i>Albiziae Cortex</i>                                    | Hehuanpi     | heart, liver, lung                    | sweet, natured                      |
| <i>Albiziae Flos</i>                                      | Hehuanhua    | heart, liver                          | sweet, natured                      |
| <i>Allii Macrostemonis Bulbus</i>                         | Xiebai       | heart, lung, stomach, large intestine | pungent, bitter, temperature        |
| <i>Ampelopsis Radix</i>                                   | Bailian      | heart, stomach                        | bitter, little cold                 |
| <i>Andrographis Herba</i>                                 | Chaunxinlian | heart, lung, large intestine, bladder | bitter, cold                        |
| <i>Angelicae Sinensis Radix</i>                           | Danggui      | liver, heart, spleen                  | sweet, pungent, temperature         |
| <i>Arnebiae Radix</i>                                     | Zicao        | heart, liver                          | sweet, salty, cold                  |
| <i>Asari Radix Et Rhizoma</i>                             | Xixin        | heart, lung, kidney                   | pungent, temperature                |
| <i>Bambusae Caulis In Taenias</i>                         | Zhuru        | lung, stomach, heart, gallbladder     | sweet, little cold                  |
| <i>Bambusae Concretio Silicea</i>                         | Tianzhuhuang | heart, liver                          | sweet, cold                         |
| <i>Baphicacanthis Cusiae Rhizoma Et Radix</i>             | Nanbanlangen | heart, stomach                        | bitter, cold                        |
| <i>Benzoinum</i>                                          | Anxixiang    | heart, spleen                         | pungent, bitter, natured            |
| <i>Borneolum Syntheticum</i>                              | Bingpian     | heart, spleen, lung                   | pungent, bitter, little cold        |
| <i>Campsis Flos</i>                                       | Lingxiaohua  | liver, pericardium                    | sweet, sour, cold                   |
| <i>Capsici Fructus</i>                                    | Lajiao       | heart, spleen                         | pungent, hot                        |
| <i>Carthami Flos</i>                                      | Honghua      | heart, liver                          | pungent, temperature                |
| <i>Catechu</i>                                            | Ercha        | lung, heart                           | bitter, astringent, little cold     |
| <i>Choerospondiatis Fructus</i>                           | Guangzao     | heart, liver                          | sweet, sour, natured                |
| <i>Chrysanthemi Indici Flos</i>                           | Yejuhua      | liver, heart                          | bitter, pungent, little cold        |
| <i>Chuanxiong Rhizoma</i>                                 | Chuanxiong   | liver, gallbladder, pericardium       | pungent, temperature                |
| <i>Cinnamomi Cortex</i>                                   | Rougui       | kidney, spleen, heart, liver          | pungent, sweet, large hot           |
| <i>Cinnamomi Ramulus</i>                                  | Guizhi       | heart, lung, bladder                  | pungent, sweet, temperature         |
| <i>Cirsii Japonici Herba</i>                              | Daji         | heart, liver                          | sweet, bitter, cool                 |
| <i>Cirsii Japonici Herba</i>                              | Dajitan      | heart, liver                          | bitter, astringent, cool            |

*Carbonisata*

---

|                                                           |                                |                                                             |                                           |
|-----------------------------------------------------------|--------------------------------|-------------------------------------------------------------|-------------------------------------------|
| <i>Clematidis Armandii Caulis</i>                         | Chuanmutong                    | heart, small intestine, bladder                             | bitter, cold                              |
| <i>Coptidis Rhizoma</i>                                   | Huanglian                      | heart, spleen, stomach, liver, gallbladder, large intestine | bitter, cold                              |
| <i>Coriolus</i>                                           | Yunzhi                         | heart, spleen, liver, kidney                                | sweet, natured                            |
| <i>Corydalis Bungeanae Herba</i>                          | Kudiding                       | heart, liver, large intestine                               | bitter, cold                              |
| <i>Croci Stigma</i>                                       | Xihonghua                      | heart, liver                                                | sweet, natured                            |
| <i>Curcumae Radix</i>                                     | Yujin                          | liver, heart, lung                                          | pungent, bitter, cold                     |
| <i>Dianthi Herba</i>                                      | Qumai                          | heart, small intestine                                      | bitter, cold                              |
| <i>Dichroae Radix</i>                                     | Changshan                      | lung, liver, heart                                          | bitter, pungent, cold, toxic              |
| <i>Draconis Sanguis</i>                                   | Xuejie                         | heart, liver                                                | sweet, salty, natured                     |
| <i>Ephedrae Radix E T Rhizoma</i>                         | Mahuanggen                     | heart, lung                                                 | sweet, astringent, natured                |
| <i>Erigerontis Herba</i>                                  | Dengzhanxixin<br>(Dengzhanhua) | heart, liver                                                | pungent, little bitter, temperature       |
| <i>Fibraureae Caulis</i>                                  | Huangteng                      | heart, liver                                                | bitter, cold                              |
| <i>Forsythiae Fructus</i>                                 | Lianqiao                       | lung, heart, small intestine                                | bitter, little cold                       |
| <i>Fritillariae Cirrhosae Bulbus</i>                      | Chuanbeimu                     | lung, heart                                                 | bitter, sweet, little cold                |
| <i>Fritillariae Hupehensis Bulbus</i>                     | Hubeibeimu                     | lung, heart                                                 | little bitter, cool                       |
| <i>Fritillariae Pallidiflorae Bulbus</i>                  | Yibeimu                        | lung, heart                                                 | bitter, sweet, little cold                |
| <i>Fritillariae Thunbergii Bulbus</i>                     | Zhebeimu                       | lung, heart                                                 | bitter, cold                              |
| <i>Fritillariae Ussuriensis Bulbus</i>                    | Pingbeimu                      | lung, heart                                                 | bitter, sweet, little cold                |
| <i>Ganoderma</i>                                          | Lingzhi                        | heart, lung, liver, kidney                                  | sweet, natured                            |
| <i>Gardeniae Fructus</i>                                  | Zhizi                          | heart, lung, Sanjiao channel                                | bitter, cold                              |
| <i>Gardeniae Fructus Praeparatus</i>                      | Jiaozhizi                      | heart, lung, Sanjiao channel                                | bitter, cold                              |
| <i>Ginkgo Folium</i>                                      | Yinxingye                      | heart, lung                                                 | sweet, bitter, astringent, natured        |
| <i>Ginseng Radix Et Rhizoma</i>                           | Renshen                        | spleen, lung, heart, kidney                                 | sweet, little bitter, little temperature  |
| <i>Ginseng Radix Et Rhizoma Rubra</i>                     | Hongshen                       | spleen, lung, heart, kidney                                 | sweet, little bitter, temperature         |
| <i>Glycyrrhizae Radix Et Rhizoma</i>                      | Gancao                         | heart, lung, spleen, stomach                                | sweet, natured                            |
| <i>Glycyrrhizae Radix Et Rhizoma Praeparata Cum Melle</i> | Zhigancao                      | heart, lung, spleen, stomach                                | sweet, natured                            |
| <i>Hippophae Fructus</i>                                  | Shaji                          | spleen, stomach, lung, heart                                | sour, astringent, temperature             |
| <i>Hyoscyami Semen</i>                                    | Tianxianzi                     | heart, stomach, liver                                       | bitter, pungent, temperature, large toxic |
| <i>Isatidis Folium</i>                                    | Daqingye                       | heart, stomach                                              | bitter, cold                              |
| <i>Isatidis Radix</i>                                     | Banlangen                      | heart, stomach                                              | bitter, cold                              |
| <i>Jujubae Fructus</i>                                    | Dazao                          | heart, spleen, stomach                                      | sweet, temperature                        |
| <i>Junci Medulla</i>                                      | Dengxincao                     | heart, lung, small intestine                                | sweet, bland, little cold                 |
| <i>Leonuri Fructus</i>                                    | Chongweizi                     | pericardium, liver                                          | pungent, bitter, little cold              |
| <i>Leonuri Herba</i>                                      | Yimucao                        | liver, pericardium, bladder                                 | bitter, pungent, little cold              |
| <i>Lilii Bulbus</i>                                       | Baihe                          | heart, lung                                                 | sweet, cold                               |
| <i>Liriopes Radix</i>                                     | Shanmaidong                    | heart, lung, stomach                                        | sweet, little bitter, little cold         |
| <i>Lobeliae Chinensis Herba</i>                           | Banbianlian                    | heart, small intestine, lung                                | pungent, natured                          |
| <i>Longan Arillus</i>                                     | Longyanrou                     | heart, spleen                                               | sweet, temperature                        |

---

|                                               |              |                                                      |                                               |
|-----------------------------------------------|--------------|------------------------------------------------------|-----------------------------------------------|
| <i>Lonicerae Flos</i>                         | Shanyinhua   | lung, heart, stomach                                 | sweet, cold                                   |
| <i>Lonicerae Japonicae Flos</i>               | Jinyinhua    | lung, heart, stomach                                 | sweet, cold                                   |
| <i>Lophatheri Herba</i>                       | Danzhuye     | heart, stomach, small intestine                      | sweet, bland, cold                            |
| <i>Mori Fructus</i>                           | Sangshen     | heart, liver, kidney                                 | sweet, sour, cold                             |
| <i>Moschus</i>                                | Shexiang     | heart, spleen                                        | pungent, temperature                          |
| <i>Moutan Cortex</i>                          | Mudanpi      | heart, liver, kidney                                 | bitter, pungent, little cold                  |
| <i>Myrrha</i>                                 | Moyao        | heart, liver, spleen                                 | pungent, bitter, natured                      |
| <i>Nelumbinis Plumula</i>                     | Lianzixin    | heart, kidney                                        | bitter, cold                                  |
| <i>Nelumbinis Semen</i>                       | Lianzi       | spleen, kidney, heart                                | sweet, astringent, natured                    |
| <i>Nelumbinis Stamen</i>                      | Lianxu       | heart, kidney                                        | sweet, astringent, natured                    |
| <i>Olibanum</i>                               | Ruxiang      | heart, liver, spleen                                 | pungent, bitter, temperature                  |
| <i>Ophiopogonis Radix</i>                     | Maidong      | heart, lung, stomach                                 | sweet, little bitter, little cold             |
| <i>Panacis Quinquefolii Radix</i>             | Xiyangshen   | heart, lung, kidney                                  | sweet, little bitter, cool                    |
| <i>Periplocae Cortex</i>                      | Xiangjiapi   | liver, kidney, heart                                 | pungent, bitter, temperature, toxic           |
| <i>Persicae Ramulus</i>                       | Taozhi       | heart, liver                                         | bitter, natured                               |
| <i>Persicae Semen</i>                         | Taoren       | heart, liver, large intestine                        | bitter, sweet, natured                        |
| <i>Physochlainae Radix</i>                    | Huashanshen  | lung, heart                                          | sweet, little bitter, temperature, toxic      |
| <i>Platycladi Semen</i>                       | Boziren      | heart, kidney, large intestine                       | sweet, natured                                |
| <i>Polygalae Radix</i>                        | Yuanzhi      | heart, kidney, lung                                  | bitter, pungent, temperature                  |
| <i>Polygoni Multiflori Caulis</i>             | Shouwuteng   | heart, liver                                         | sweet, natured                                |
| <i>Polygoni Multiflori Radix</i>              | Heshouwu     | liver, heart, kidney                                 | bitter, sweet, astringent, little temperature |
| <i>Polygoni Multiflori Radix Praeparata</i>   | Zhiheshouwu  | liver, heart, kidney                                 | bitter, sweet, astringent, little temperature |
| <i>Polygoni Tinctorii Folium</i>              | Liaodaqingye | heart, stomach                                       | bitter, cold                                  |
| <i>Poria</i>                                  | Fuling       | heart, lung, spleen, kidney                          | sweet, bland, natured                         |
| <i>Rehmanniae Radix</i>                       | Dihuang      | heart, liver, kidney                                 | sweet, bitter, cold                           |
| <i>Rhei Radix Et Rhizoma</i>                  | Dahuang      | spleen, stomach, large intestine, liver, pericardium | bitter, cold                                  |
| <i>Rhodiolae Crenulatae Radix Et Rhizoma</i>  | Hongjingtian | lung, heart                                          | sweet, bitter, natured                        |
| <i>Salviae Miltiorrhizae Radix Et Rhizoma</i> | Danshen      | heart, liver                                         | bitter, little cold                           |
| <i>Santali Albi Lignum</i>                    | Tanxiang     | spleen, stomach, heart, lung                         | pungent, temperature                          |
| <i>Sappan Lignum</i>                          | Sumu         | heart, liver, spleen                                 | sweet, salty, natured                         |
| <i>Sarcandrae Herba</i>                       | Zhongjiefeng | heart, liver                                         | bitter, pungent, natured                      |
| <i>Schisandrae Chinensis Fructus</i>          | Wuweizi      | lung, heart, kidney                                  | sour, sweet, temperature                      |
| <i>Schisandrae Sphenantherae Fructus</i>      | Nanwuweizi   | lung, heart, kidney                                  | sour, sweet, temperature                      |
| <i>Selaginellae Herba</i>                     | Juanbai      | liver, heart                                         | pungent, natured                              |
| <i>Sophorae Flavescentis Radix</i>            | Kushen       | heart, liver, stomach, large intestine, bladder      | bitter, cold                                  |

---

|                                         |             |                                         |                         |
|-----------------------------------------|-------------|-----------------------------------------|-------------------------|
| <i>Styrax</i>                           | Suhexiang   | heart, spleen                           | pungent, temperature    |
| <i>Tamaricis Cacumen</i>                | Xiheliu     | heart, lung, stomach                    | sweet, pungent, natured |
| <i>Trachelospermi Caulis E T Folium</i> | Luoshiteng  | heart, liver, kidney                    | bitter, little cold     |
| <i>Typhae Pollen</i>                    | Puhuang     | liver, pericardium                      | sweet, natured          |
| <i>Uncariae Ramulus C U M Uncis</i>     | Gouteng     | liver, pericardium                      | sweet, cool             |
| <i>Vignae Semen</i>                     | Chixiaodou  | heart, small intestine                  | sweet, sour, natured    |
| <i>Violae Herba</i>                     | Zihuadiding | heart, liver                            | bitter, pungent, cold   |
| <i>Zingiberis Rhizoma</i>               | Ganjiang    | spleen, stomach, kidney,<br>heart, lung | pungent, hot            |
| <i>Ziziphi Spinosae Semen</i>           | Suanzaoren  | liver, gallbladder, heart               | sweet, sour, natured    |

---

### Supplementary S4 Herbs belonged to stomach meridian

| Herb Name                                     | Pinyin         | Meridian                              | Property and Flavor                    |
|-----------------------------------------------|----------------|---------------------------------------|----------------------------------------|
| <i>Abri Herba</i>                             | Jigucao        | liver, stomach                        | sweet, little bitter, cool             |
| <i>Acori Tatarinowii Rhizoma</i>              | Shichangpu     | heart, stomach                        | pungent, bitter, temperature           |
| <i>Adenophorae Radix</i>                      | Nanshashen     | lung, stomach                         | sweet, little cold                     |
| <i>Aesculi Semen</i>                          | Suoluozi       | liver, stomach                        | sweet, temperature                     |
| <i>Ailanthi Cortex</i>                        | Chunpi         | large intestine, stomach, liver       | bitter, astringent, cold               |
| <i>Akebiae Fructus</i>                        | Yuzhizi        | liver, gallbladder, stomach, bladder  | bitter, cold                           |
| <i>Allii Sativi Bulbus</i>                    | Dasuan         | spleen, stomach, lung                 | pungent, temperature                   |
| <i>Allii Macrostemonis Bulbus</i>             | Xiebai         | heart, lung, stomach, large intestine | pungent, bitter, temperature           |
| <i>Aloe</i>                                   | Luhui          | liver, stomach, large intestine       | bitter, cold                           |
| <i>Alpiniae Katsumadai Semen</i>              | Caodoukou      | spleen, stomach                       | pungent, temperature                   |
| <i>Alpiniae Officinarum Rhizoma</i>           | Gaoliangjiang  | spleen, stomach                       | pungent, hot                           |
| <i>Amomi Fructus</i>                          | Sharen         | spleen, stomach, kidney               | pungent, temperature                   |
| <i>Amomi Fructus Rotundus</i>                 | Doukou         | lung, spleen, stomach                 | pungent, temperature                   |
| <i>Ampelopsis Radix</i>                       | Bailian        | heart, stomach                        | bitter, little cold                    |
| <i>Ampelopsis Radix</i>                       | Baiwei         | stomach, liver, kidney                | bitter, salty, cold                    |
| <i>Anemarrhenae Rhizoma</i>                   | Zhimu          | lung, stomach, kidney                 | bitter, sweet, cold                    |
| <i>Angelicae Dahuricae Radix</i>              | Baizhi         | stomach, large intestine, lung        | pungent, temperature                   |
| <i>Anisi Stellati Fructus</i>                 | Bajiaohuixiang | liver, kidney, spleen, stomach        | pungent, temperature                   |
| <i>Aquilariae Lignum Resinatum</i>            | Chenxiang      | spleen, stomach, kidney               | pungent, bitter, little temperature    |
| <i>Arctii Fructus</i>                         | Niubangzi      | lung, stomach                         | pungent, bitter, cold                  |
|                                               |                | spleen, stomach, large intestine,     | pungent, little temperature            |
| <i>Arecae Pericarpium</i>                     | Dafupi         | small intestine                       |                                        |
| <i>Arecae Semen</i>                           | Binglang       | stomach, large intestine              | bitter, pungent, temperature           |
| <i>Arecae Semen Tostum</i>                    | Jiaobinglang   | stomach, large intestine              | bitter, pungent, temperature           |
| <i>Artemisiae Scopariae Herba</i>             | Yinchen        | spleen, stomach, liver, gallbladder   | bitter, pungent, little cold           |
| <i>Atractylodis Macrocephalae Rhizoma</i>     | Baizhu         | spleen, stomach                       | bitter, sweet, temperature             |
| <i>Atractylodis Rhizoma</i>                   | Cangzhu        | spleen, stomach, liver                | pungent, bitter, temperature           |
|                                               |                | spleen, stomach, large intestine,     | pungent, bitter, temperature           |
| <i>Aucklandiae Radix</i>                      | Muxiang        | Sanjiao channel, gallbladder          |                                        |
| <i>Aurantii Fructus</i>                       | Zhike          | spleen, stomach                       | bitter, pungent, sour, little cold     |
| <i>Aurantii Fructus Immaturus</i>             | Zhishi         | spleen, stomach                       | bitter, pungent, sour, little cold     |
| <i>Bambusae Caulis In Taenias</i>             | Zhuru          | lung, stomach, heart, gallbladder     | sweet, little cold                     |
| <i>Baphicacanthis Cusiae Rhizoma Et Radix</i> | Nanbanlangen   | heart, stomach                        | bitter, cold                           |
| <i>Berberidis Radix</i>                       | Sankezhen      | liver, stomach, large intestine       | bitter, cold, toxic                    |
| <i>Bletillae Rhizoma</i>                      | Baiji          | lung, liver, stomach                  | bitter, sweet, astringent, little cold |
| <i>Callicarpae Formosanae Folium</i>          | Zizhuye        | liver, lung, stomach                  | bitter, astringent, cool               |
| <i>Canarii Fructus</i>                        | Qingguo        | lung, stomach                         | sweet, sour, natured                   |
| <i>Canavaliae Semen</i>                       | Daodou         | stomach, kidney                       | sweet, temperature                     |

|                                              |                 |                                                                       |                                                                  |
|----------------------------------------------|-----------------|-----------------------------------------------------------------------|------------------------------------------------------------------|
| <i>Cannabis Semen</i>                        | Huomaren        | spleen, stomach, large intestine                                      | sweet, natured                                                   |
| <i>Carotae Fructus</i>                       | Nanheshi        | spleen, stomach                                                       | bitter, pungent, natured, little toxic                           |
| <i>Carpesh Fructus</i>                       | Heshi           | spleen, stomach                                                       | bitter, pungent, natured, little toxic                           |
| <i>Caryophylli Flos</i>                      | Dingxiang       | spleen, stomach, lung, kidney                                         | pungent, temperature                                             |
| <i>Caryophyllifructus</i>                    | Mudingxiang     | spleen, stomach, lung, kidney                                         | pungent, temperature                                             |
| <i>Chelidonii Herba</i>                      | Baiqucai        | lung, stomach                                                         | bitter, cool, toxic                                              |
| <i>Cichorii Herba Cichorii Radix</i>         | Juju            | liver, gallbladder, stomach<br>lung, spleen, stomach, large intestine | little bitter, salty, cool<br>pungent, little sweet, little cold |
| <i>Cimicifugae Rhizoma</i>                   | Shengma         | intestine                                                             |                                                                  |
| <i>Citri Reticulatae Pericarpium Viride</i>  | Qingpi          | liver, gallbladder, stomach                                           | bitter, pungent, temperature                                     |
| <i>Citri Sarcodactylis Fructus</i>           | Foshou          | liver, spleen, stomach, lung                                          | pungent, bitter, sour, temperature                               |
| <i>Coicis Semen</i>                          | Yiyiren         | spleen, stomach, lung                                                 | sweet, bland, cool                                               |
| <i>Commelinae Herba</i>                      | Yazhicao        | lung, stomach, small intestine<br>heart, spleen, stomach, liver,      | sweet, bland, cold<br>bitter, cold                               |
| <i>Coptidis Rhizoma</i>                      | Huanglian       | gallbladder, large intestine                                          |                                                                  |
| <i>Crataegifructus</i>                       | Shanzha         | spleen, stomach, liver                                                | sour, sweet, little temperature                                  |
| <i>Crotonis Semen Pulveratum</i>             | Badoushuang     | stomach, large intestine                                              | pungent, hot, large toxic                                        |
| <i>Crotonis Fructus</i>                      | Badou           | stomach, large intestine                                              | pungent, hot, large toxic                                        |
| <i>Cynanchi Paniculati Radix Et Rhizoma</i>  | Xuchangqing     | liver, stomach                                                        | pungent, temperature                                             |
| <i>Dendrobii Caulis</i>                      | Shihu           | stomach, kidney                                                       | sweet, little cold                                               |
| <i>Dictamni Cortex</i>                       | Baixianpi       | spleen, stomach, bladder                                              | bitter, cold                                                     |
| <i>Dryopteridis Crassirhizomatis Rhizoma</i> | Mianmaguanzhong | liver, stomach                                                        | bitter, little cold, little toxic                                |
| <i>Echinopsis Radix</i>                      | Yuzhouloulu     | stomach                                                               | bitter, cold                                                     |
| <i>Eriobotryae Folium</i>                    | Pipaye          | lung, stomach                                                         | bitter, little cold                                              |
| <i>Erycibes Caulis</i>                       | Dinggongteng    | liver, spleen, stomach                                                | pungent, temperature, little toxic                               |
| <i>Euodiae Fructus</i>                       | Wuzhuyu         | liver, spleen, stomach, kidney                                        | pungent, bitter, hot, little toxic                               |
| <i>Eupatorii Herba</i>                       | Peilan          | spleen, stomach, lung                                                 | pungent, natured                                                 |
| <i>Ferulae Resina</i>                        | Awei            | spleen, stomach                                                       | bitter, pungent, temperature                                     |
| <i>Foeniculi Fructus</i>                     | Xiaohuixiang    | liver, kidney, spleen, stomach                                        | pungent, temperature                                             |
| <i>Gentianae Macrophyllae Radix</i>          | Qinjiao         | stomach, liver, gallbladder                                           | pungent, bitter, natured                                         |
| <i>Ginseng Folium</i>                        | Renshenye       | lung, stomach                                                         | bitter, sweet, cold                                              |
| <i>Gleditsiae Spina</i>                      | Zaojiaoci       | liver, stomach                                                        | pungent, temperature                                             |
| <i>Glehniae Radix</i>                        | Beishashen      | lung, stomach                                                         | sweet, little bitter, little cold                                |
| <i>Glycyrrhizae Radix Et Rhizoma</i>         | Gancao          | heart, lung, spleen, stomach                                          | sweet, natured                                                   |
| <i>Glycyrrhizae Radix Et Rhizoma</i>         |                 | heart, lung, spleen, stomach                                          | sweet, natured                                                   |
| <i>Praeparata Cum Melle</i>                  | Zhigancao       |                                                                       |                                                                  |
| <i>Hippophae Fructus</i>                     | Shaji           | spleen, stomach, lung, heart                                          | sour, astringent, temperature                                    |
| <i>Hordei Fructus Germinatus</i>             | Maiya           | spleen, stomach                                                       | sweet, natured                                                   |
| <i>Hyoscyami Semen</i>                       | Tianxianzi      | heart, stomach, liver                                                 | bitter, pungent, temperature, large toxic                        |
| <i>Ilicis Rotundae Cortex</i>                | Jiubiyang       | lung, stomach, large intestine, liver                                 | bitter, cold                                                     |
| <i>Imperatae Rhizoma</i>                     | Baimaogen       | lung, stomach, bladder                                                | sweet, cold                                                      |

|                                       |             |                                                       |                                                    |
|---------------------------------------|-------------|-------------------------------------------------------|----------------------------------------------------|
| <i>Inulae Flos</i>                    | Xuanfuhua   | lung, spleen, stomach, large intestine                | bitter, pungent, salty, little temperature         |
| <i>Isatidis Folium</i>                | Daqingye    | heart, stomach                                        | bitter, cold                                       |
| <i>Isatidis Radix</i>                 | Banlangen   | heart, stomach                                        | bitter, cold                                       |
| <i>Jujubae Fructus</i>                | Dazao       | heart, spleen, stomach                                | sweet, temperature                                 |
| <i>Kaempferiae Rhizoma</i>            | Shannai     | stomach                                               | pungent, temperature                               |
| <i>Kaki Calyx</i>                     | Shidi       | stomach                                               | bitter, astringent, natured                        |
| <i>Lablab Semen Album</i>             | Baibiandou  | spleen, stomach                                       | sweet, little temperature                          |
| <i>Liriopes Radix</i>                 | Shanmaidong | heart, lung, stomach                                  | sweet, little bitter, little cold                  |
| <i>Litsea Fructus</i>                 | Bichengqie  | spleen, stomach, kidney, bladder                      | pungent, temperature                               |
| <i>Lonicerae Flos</i>                 | Shanyinhua  | lung, heart, stomach                                  | sweet, cold                                        |
| <i>Lonicerae Japonicae Caulis</i>     | Rendongteng | lung, stomach                                         | sweet, cold                                        |
| <i>Lonicerae Japonicae Flos</i>       | Jinyinhua   | lung, heart, stomach                                  | sweet, cold                                        |
| <i>Lophatheri Herba</i>               | Danzhuye    | heart, stomach, small intestine                       | sweet, bland, cold                                 |
| <i>Luffae Fructus Retinervus</i>      | Sigualuo    | lung, stomach, liver                                  | sweet, natured                                     |
| <i>Magnoliae Flos</i>                 | Xinyi       | lung, stomach, spleen, stomach, lung, large intestine | pungent, temperature, bitter, pungent, temperature |
| <i>Magnoliae Officinalis Cortex</i>   | Houpu       | intestine                                             |                                                    |
| <i>Magnoliae Officinalis Flos</i>     | Houpuhua    | spleen, stomach                                       | bitter, little temperature                         |
| <i>Mahoniae Caulis</i>                | Gonglaomu   | liver, stomach, large intestine                       | bitter, cold                                       |
| <i>Meliae Cortex</i>                  | Kulianpi    | liver, spleen, stomach                                | bitter, cold, toxic                                |
| <i>Menispermis Rhizoma</i>            | Beidougen   | lung, stomach, large intestine                        | bitter, cold, little toxic                         |
| <i>Microctis Folium</i>               | Buzhaye     | spleen, stomach                                       | little sour, cool                                  |
| <i>Mirabilitum Praeparatum</i>        | Xiguashuang | lung, stomach, large intestine                        | salty, cold                                        |
| <i>Momordicae Semen</i>               | Mubiezi     | liver, spleen, stomach                                | bitter, little sweet, cool, toxic                  |
| <i>Moslae Herba</i>                   | Xiangru     | lung, stomach                                         | pungent, little temperature                        |
| <i>Mume Flos</i>                      | Meihua      | liver, stomach, lung                                  | little sour, natured                               |
| <i>Murrayae Folium Et Cacumen</i>     | Jiulixiang  | liver, stomach                                        | pungent, little bitter, temperature, little toxic  |
| <i>Myristicae Semen</i>               | Roudoukou   | spleen, stomach, large intestine                      | pungent, temperature                               |
| <i>Nardostachyos Radix Et Rhizoma</i> | Gansong     | spleen, stomach                                       | pungent, sweet, temperature                        |
| <i>Nelumbinis Folium</i>              | Heye        | liver, spleen, stomach                                | bitter, natured                                    |
| <i>Nelumbinis Rhizomatis Nodus</i>    | Oujie       | liver, lung, stomach                                  | sweet, astringent, natured                         |
| <i>Notoginseng Radix Et Rhizoma</i>   | Sanqi       | liver, stomach                                        | sweet, little bitter, temperature                  |
| <i>Ophiopogonis Radix</i>             | Maidong     | heart, lung, stomach                                  | sweet, little bitter, little cold                  |
| <i>Oroxylis Semen</i>                 | Muhudie     | lung, liver, stomach                                  | bitter, sweet, cool                                |
| <i>Oryzae Fructus Germinatus</i>      | Daoya       | spleen, stomach                                       | sweet, temperature                                 |
| <i>Panacis Majoris Rhizoma</i>        | Zhuzishen   | liver, lung, stomach                                  | bitter, sweet, little cold                         |
| <i>Phragmitis Rhizoma</i>             | Lugen       | lung, stomach                                         | sweet, cold                                        |
| <i>Phyllanthifructus</i>              | Yuganzi     | lung, stomach                                         | sweet, sour, astringent, cool                      |
| <i>Picrorhizae Rhizoma</i>            | Huhuaglian  | liver, stomach, large intestine                       | bitter, cold                                       |
| <i>Pinelliae Rhizoma</i>              | Banxia      | spleen, stomach, lung                                 | pungent, temperature, toxic                        |
| <i>Pinelliae Rhizoma Praeparatum</i>  | Fabanxia    | spleen, stomach, lung                                 | pungent, temperature                               |

|                                              |                |                                                 |                                   |
|----------------------------------------------|----------------|-------------------------------------------------|-----------------------------------|
| <i>Piperis Fructus</i>                       | Hujiao         | stomach, large intestine                        | pungent, hot                      |
| <i>Piperis Longi Fructus</i>                 | Biba           | stomach, large intestine                        | pungent, hot                      |
| <i>Pogostemonis Herba</i>                    | Guanghuoxiang  | spleen, stomach, lung                           | pungent, little temperature       |
| <i>Polygonati Odorati Rhizoma</i>            | Yuzhu          | lung, stomach                                   | sweet, little cold                |
| <i>Polygoni Orientalis Fructus</i>           | Shuihonghuazi  | liver, stomach                                  | salty, little cold                |
| <i>Polygoni Tinctorii Folium</i>             | Liaodaqingye   | heart, stomach                                  | bitter, cold                      |
| <i>Potentillae Discoloris Herba</i>          | Fanbaicao      | liver, stomach, large intestine                 | sweet, little bitter, natured     |
| <i>Puerariae Lobatae Radix</i>               | Gegen          | spleen, stomach, lung                           | sweet, pungent, cool              |
| <i>Puerariae Thomsonii Radix</i>             | Fenge          | spleen, stomach                                 | sweet, pungent, cool              |
| <i>Pulsatillae Radix</i>                     | Baitouweng     | stomach, large intestine                        | bitter, cold                      |
| <i>Quisqualis Fructus</i>                    | Shijunzi       | spleen, stomach                                 | sweet, temperature                |
| <i>Rabdosiae Rubescentis Herba</i>           | Donglingcao    | lung, stomach, liver                            | bitter, sweet, little cold        |
| <i>Raphani Semen</i>                         | Laifuzi        | lung, spleen, stomach                           | pungent, sweet, natured           |
| <i>Rhapontici Radix</i>                      | Loulu          | stomach                                         | bitter, cold                      |
|                                              |                | spleen, stomach, large intestine,               | bitter, cold                      |
| <i>Rhei Radix Et Rhizoma</i>                 | Dahuang        | liver, heart                                    |                                   |
| <i>Santali Albi Lignum</i>                   | Tanxiang       | spleen, stomach, heart, lung                    | pungent, temperature              |
| <i>Scrophulariae Radix</i>                   | Xuanshen       | lung, stomach, kidney                           | sweet, bitter, salty, little cold |
| <i>Semen Melo</i>                            | Tianguazi      | lung, stomach, large intestine                  | sweet, cold                       |
| <i>Semiaquilegiae Radix</i>                  | Tiankuizi      | liver, stomach                                  | sweet, bitter, cold               |
| <i>Setariae Fructus Germinatus</i>           | Guya           | spleen, stomach                                 | sweet, temperature                |
| <i>Siphonostegiae Herba</i>                  | Beiliujinu     | spleen, stomach, liver, gallbladder             | bitter, cold                      |
| <i>Smilacis Glabrae Rhizoma</i>              | Tufuling       | liver, stomach                                  | sweet, bland, natured             |
| <i>Sojae Semen Germinatum</i>                | Dadouhuangjuan | spleen, stomach, lung                           | sweet, natured                    |
| <i>Sojae Semen Praeparatum</i>               | Dandouchi      | lung, stomach                                   | pungent, bitter, cool             |
| <i>Sophorae Tonkinensis Radix Et Rhizoma</i> | Shandougen     | heart, liver, stomach, large intestine, bladder | bitter, cold                      |
| <i>Sophorae Flavescens Radix</i>             | Kushen         | intestine, bladder                              |                                   |
| <i>Stachyuri Medulla Helwingiae Medulla</i>  | Xiaotongcao    | lung, stomach                                   | sweet, bland, cold                |
| <i>Stauntoniae Caulis Et Folium</i>          | Yemugua        | liver, stomach                                  | little bitter, natured            |
| <i>Stellariae Radix</i>                      | Yinchaihu      | liver, stomach                                  | sweet, little cold                |
| <i>Swertiae Herba</i>                        | Dangyao        | liver, stomach, large intestine                 | bitter, cold                      |
| <i>Tamaricis Cacumen</i>                     | Xiheliu        | heart, lung, stomach                            | sweet, pungent, natured           |
| <i>Taraxaci Herba</i>                        | Pugongying     | liver, stomach                                  | bitter, sweet, cold               |
| <i>Tetrapanacis Medulla</i>                  | Tongcao        | lung, stomach                                   | sweet, bland, little cold         |
| <i>Torreyae Semen</i>                        | Feizi          | lung, stomach, large intestine                  | sweet, natured                    |
| <i>Trichosanthis Radix</i>                   | Tianhuafen     | lung, stomach                                   | sweet, little bitter, little cold |
| <i>Trichosanthis Fructus</i>                 | Gualou         | lung, stomach, large intestine                  | sweet, little bitter, cold        |
| <i>Trichosanthis Pericarpium</i>             | Gualoupi       | lung, stomach                                   | sweet, cold                       |
| <i>Trichosanthis Semen</i>                   | Gualouzi       | lung, stomach, large intestine                  | sweet, cold                       |
| <i>Trichosanthis Semen Tostum</i>            | Chaogualouzi   | lung, stomach, large intestine                  | sweet, cold                       |
| <i>Tsaoko Fructus</i>                        | Caoguo         | spleen, stomach                                 | pungent, temperature              |

|                                       |               |                                               |                                        |
|---------------------------------------|---------------|-----------------------------------------------|----------------------------------------|
| <i>Typhonii Rhizoma</i>               | Baifuzi       | stomach, liver                                | pungent, temperature, toxic            |
| <i>Vaccariae Semen</i>                | Wnagbuliuxing | liver, stomach                                | bitter, natured                        |
| <i>Vitidis Fructus</i>                | Manjingzi     | bladder, liver, stomach                       | pungent, bitter, little cold           |
| <i>Vladimiriae Radix</i>              | Chuanmuxiang  | spleen, stomach, large intestine, gallbladder | pungent, bitter, temperature           |
| <i>Zanthoxyli Pericarpium</i>         | Huajiao       | spleen, stomach, kidney                       | pungent, temperature                   |
| <i>Zanthoxyli Radix</i>               | Liangmianzhen | liver, stomach                                | bitter, pungent, natured, little toxic |
| <i>Zingiberis Rhizoma</i>             | Ganjiang      | spleen, stomach, kidney, heart, lung          | pungent, hot                           |
| <i>Zingiberis Rhizoma Praeparatum</i> | Paojiang      | spleen, stomach, kidney                       | pungent, hot                           |
| <i>Zingiberis Rhizoma Recens</i>      | Shengjiang    | lung, spleen, stomach                         | pungent, little temperature            |

### Supplementary S5 The list of Chinese Patent Medicine of CVDs

| Chinese patent medicine    | Diseases of CVDs | Chinese patent medicine   | Diseases of CVDs |
|----------------------------|------------------|---------------------------|------------------|
| Yangxinshu cappules        | Angina           | Fufang danshen pills      | Angina pectoris  |
| Yixintongmai particles     | Angina           | Maiguantong pills         | Angina pectoris  |
| Yixintong pills            | Angina           | Guanxindanshao pills      | Angina pectoris  |
| Yixin pellets              | Angina           | Guanxindanshen pills      | Angina pectoris  |
| Yinxingye pills            | Angina           | Guanxinjing capsules      | Angina pectoris  |
| Yufengningxin particles    | Angina           | Guanxinkang pills         | Angina pectoris  |
| Yuxintong capsules         | Angina           | Guanxinshutong capsules   | Angina pectoris  |
| Zhenxintong oral liquid    | Angina           | Guanxintai pellets        | Angina pectoris  |
| Zhengxintai capsules       | Angina           | Huangqishengmai particles | Angina pectoris  |
| Zixinyin capsules          | Angina           | Huangyangning pills       | Angina pectoris  |
| Baoxinbao                  | Cardiodynia      | Huoxin pellets            | Angina pectoris  |
| Buxinqi oral liquid        | Cardiodynia      | Jiruxin pills             | Angina pectoris  |
| Danling xinshu capsules    | Cardiodynia      | Jinyinsanqi capsules      | Angina pectoris  |
| Danlou pills               | Cardiodynia      | Jingzhiguanxin pills      | Angina pectoris  |
| Dengzhanhua particles      | Cardiodynia      | Jiuxinjin pellets         | Angina pectoris  |
| Dengzhanshengmai capsules  | Cardiodynia      | Jiuxin pellets            | Angina pectoris  |
| Dengzhanxixin injection    | Cardiodynia      | Kudiezi injection         | Angina pectoris  |
| Dunye guanxingning pills   | Cardiodynia      | Lingbaohuxin pills        | Angina pectoris  |
| Fuxin pills                | Cardiodynia      | Mailuotong particles      | Angina pectoris  |
| Guanxinkang pills          | Cardiodynia      | Maiping pills             | Angina pectoris  |
| Guanxintai pellets         | Cardiodynia      | Meiguo oral liquid        | Angina pectoris  |
| Huangqishengmai particles  | Cardiodynia      | Naoxinan capsules         | Angina pectoris  |
| Huangyangning pills        | Cardiodynia      | Naoxinqing pills          | Angina pectoris  |
| Huoxin pellets             | Cardiodynia      | Naoxintong capsules       | Angina pectoris  |
| Huoxuetongluo capsules     | Cardiodynia      | Nuodikang capsules        | Angina pectoris  |
| Jiuxinjin pellets          | Cardiodynia      | Qishenyisi drop pills     | Angina pectoris  |
| Jiuxin pellets             | Cardiodynia      | Sanqi guanxinning mixture | Angina pectoris  |
| Kangfuchun oral liquid     | Cardiodynia      | Sanqi capsules            | Angina pectoris  |
| Kudiezi injection          | Cardiodynia      | Sanshenjiangzhi liquid    | Angina pectoris  |
| Maiping pills              | Cardiodynia      | Shanhaidan pills          | Angina pectoris  |
| Naoxinan capsules          | Cardiodynia      | Shexiangbaoxin pellets    | Angina pectoris  |
| Naoxinqing pills           | Cardiodynia      | Shexiang xintong ointment | Angina pectoris  |
| Naoxintong capsules        | Cardiodynia      | Shenlongningxin capsules  | Angina pectoris  |
| Sanqi guangxinning mixture | Cardiodynia      | Shenxiang suhe pellets    | Angina pectoris  |
| Sanshen jiangzhi fluid     | Cardiodynia      | Shuxin jiangzhi pills     | Angina pectoris  |
| Shexiang xintong ointment  | Cardiodynia      | Shuxin oral liquid        | Angina pectoris  |
| Shenxiang suhe pellets     | Cardiodynia      | Shuxiong pills            | Angina pectoris  |
| Shuxin jiangzhi pills      | Cardiodynia      | Shuangdan oral liquid     | Angina pectoris  |
| Shuangdan oral liquid      | Cardiodynia      | Shuangshenlong capsules   | Angina pectoris  |
| Suxiaoxintong aerosol      | Cardiodynia      | Tongmai ciwujia capsules  | Angina pectoris  |
| Tongqiaoyixin pills        | Cardiodynia      | Xinfukang capsules        | Angina pectoris  |

|                           |                 |                           |                 |
|---------------------------|-----------------|---------------------------|-----------------|
| Tongxinshu capsules       | Cardiodynia     | Xinli pellets             | Angina pectoris |
| Xindakang pills           | Cardiodynia     | Xinling pellets           | Angina pectoris |
| Xinfukang capsules        | Cardiodynia     | Xinnaokang capsules       | Angina pectoris |
| Xinli pellets             | Cardiodynia     | Xinnaoning capsules       | Angina pectoris |
| Xinling pellets           | Cardiodynia     | Xinnao qingruan capsules  | Angina pectoris |
| Xinnaoqingruan capsules   | Cardiodynia     | Xinnao shutong capsules   | Angina pectoris |
| Xinnaoshutong capsules    | Cardiodynia     | Xinning pills             | Angina pectoris |
| Xintong oral liquid       | Cardiodynia     | Xinrong oral liquid       | Angina pectoris |
| Xintongning drop pills    | Cardiodynia     | Xinshule pills            | Angina pectoris |
| Xintongning aerosol       | Cardiodynia     | Xinshuning pills          | Angina pectoris |
| Xiongdanjiuxin pellets    | Cardiodynia     | Xinshu oral liquid        | Angina pectoris |
| Xuesaitong capsules       | Cardiodynia     | Xintongning drop pills    | Angina pectoris |
| Xueshuangtong capsules    | Cardiodynia     | Xintongning spray         | Angina pectoris |
| Yangxinshengmai particles | Cardiodynia     | Xinwuyou pills            | Angina pectoris |
| Yixinfumai particles      | Cardiodynia     | Xinxinshu capsules        | Angina pectoris |
| Yixintongmai particles    | Cardiodynia     | Xinxuening pills          | Angina pectoris |
| Yixin pellets             | Cardiodynia     | Xinyuan capsules          | Angina pectoris |
| Yinxingye pills           | Cardiodynia     | Xingling particles        | Angina pectoris |
| Yingxindan                | Cardiodynia     | Xiongdanjiuxin pellets    | Angina pectoris |
| Zhengxinjiangzhi pills    | Cardiodynia     | Xuefuzhuyu capsules       | Angina pectoris |
| Zhijiangning pills        | Cardiodynia     | Xuesaitong capsules       | Angina pectoris |
| Ankangxinbao pellets      | Angina pectoris | Xueshuangtong capsules    | Angina pectoris |
| Baoxinbao                 | Angina pectoris | Yanghuosanqi pills        | Angina pectoris |
| Bingqi pills              | Angina pectoris | Yangxinshengmai particles | Angina pectoris |
| Buxinqi oral liquid       | Angina pectoris | Yinaoning pills           | Angina pectoris |
| Danhong solution          | Angina pectoris | Yixinfumai particles      | Angina pectoris |
| Danlou pills              | Angina pectoris | Yixin capsules            | Angina pectoris |
| Danqi pills               | Angina pectoris | Yixinshu capsules         | Angina pectoris |
| Danshen pills             | Angina pectoris | Yixin tongmai particles   | Angina pectoris |
| Danxiang glucose solution | Angina pectoris | Yixintong pills           | Angina pectoris |
| Danxiongtongmai particles | Angina pectoris | Yixin pellets             | Angina pectoris |
| Dengzhanhua particles     | Angina pectoris | Yinxingye pills           | Angina pectoris |
| Dengzhanhengmai capsules  | Angina pectoris | Zhenxintong oral liquid   | Angina pectoris |
| Dengzhanxixin capsules    | Angina pectoris | Zhengxin jiangzhi pills   | Angina pectoris |
| Dengzhanxixin injection   | Angina pectoris | Zhengxintai capsules      | Angina pectoris |
| Di'aoxinxuekang capsules  | Angina pectoris | Zhijiangning pills        | Angina pectoris |
| Dunye guanxinling pills   | Angina pectoris | Zhusheyong danshen        | Angina pectoris |
| Fufang danshen drop pills | Angina pectoris | Zixinyin capsules         | Angina pectoris |

### Supplementary S6 The list of Chinese Patent Medicine of GIDs

| Chinese patent medicine       | Diseases of GIDs           | Chinese patent medicine     | Diseases of GIDs  |
|-------------------------------|----------------------------|-----------------------------|-------------------|
| Guhaiheng pills               | Peptic ulcer               | Fufang chenxiang wei pills  | Chronic Gastritis |
| Haiganwei pills               | Peptic ulcer               | Fufang houtou particles     | Chronic Gastritis |
| Hewei pills                   | Peptic ulcer               | Fufang longmaluwei pills    | Chronic Gastritis |
| Jianwei Yuyang pills          | Peptic ulcer               | Tianqi weitong particles    | Chronic Gastritis |
| Jinlian Weishu pills          | Peptic ulcer               | Ganhaiweihai capsules       | Chronic Gastritis |
| Kuidekang particles           | Peptic ulcer               | Hougu pills                 | Chronic Gastritis |
| Pingkui power                 | Peptic ulcer               | Houtou jianweiling capsules | Chronic Gastritis |
| Qiangli Fengrujiangjiao pills | Peptic ulcer               | Houtoujun pills             | Chronic Gastritis |
| Shenjiao particles            | Peptic ulcer               | Jianwei xiaoyan particles   | Chronic Gastritis |
| Weidekang particles           | Peptic ulcer               | Jinfo zhitong pills         | Chronic Gastritis |
| Weisu particle                | Peptic ulcer               | Jinlian weishu pills        | Chronic Gastritis |
| Weitengning pills             | Peptic ulcer               | Jiubiyang weitong pills     | Chronic Gastritis |
| Weitongshu pills              | Peptic ulcer               | Kuiyang pills               | Chronic Gastritis |
| Weixiangning particles        | Peptic ulcer               | Kuiyangsan capsules         | Chronic Gastritis |
| Weiyouxin pills               | Peptic ulcer               | Longqi weikang pills        | Chronic Gastritis |
| Xiangyao Weian capsules       | Peptic ulcer               | Ludangshen ointment         | Chronic Gastritis |
| Xueshan Weibao pills          | Peptic ulcer               | Nuanwei shule particle      | Chronic Gastritis |
| Xinxu Weitong particle        | Peptic ulcer               | Piweishu pills              | Chronic Gastritis |
| Yuanhe Zhengwei pills         | Peptic ulcer               | Quyuyiwei capsules          | Chronic Gastritis |
| Danguixiang particles         | Chronic atrophic gastritis | Saiweian capsules           | Chronic Gastritis |
| Hewei Jiangni capsules        | Chronic atrophic gastritis | Shenchai particle           | Chronic Gastritis |
| Knagji Xiaoke pills           | Chronic atrophic gastritis | Shenmeiyangwie particle     | Chronic Gastritis |
| Moluo oral liquid             | Chronic atrophic gastritis | Weidean pills               | Chronic Gastritis |
| Quyu Yiwei capsules           | Chronic atrophic gastritis | Weierning pills             | Chronic Gastritis |
| Shenqi Jianwei particles      | Chronic atrophic gastritis | Weian particles             | Chronic Gastritis |
| Weierkang pills               | Chronic atrophic gastritis | Weikang particles           | Chronic Gastritis |
| Weilening pills               | Chronic atrophic gastritis | Weikangling particles       | Chronic Gastritis |
| Weileshu oral liquid          | Chronic atrophic gastritis | Weile particles             | Chronic Gastritis |
| Weilexin capsules             | Chronic atrophic gastritis | Weinaian capsules           | Chronic Gastritis |
| Weiwanshu particles           | Chronic atrophic gastritis | Weining capsules            | Chronic Gastritis |
| Wenweishu capsules            | Chronic atrophic gastritis | Weisu particles             | Chronic Gastritis |
| Xuhanweitong particles        | Chronic atrophic gastritis | Weitongping particles       | Chronic Gastritis |
| Yangwei particle              | Chronic atrophic gastritis | Weitongshu pills            | Chronic Gastritis |
| Yangweishu capsules           | Chronic atrophic gastritis | Weixiangning particles      | Chronic Gastritis |
| Yangyingqingwei particle      | Chronic atrophic gastritis | Weixinshu capsules          | Chronic Gastritis |
| Anwei capsules                | Chronic Gastritis          | Weiyankang capsules         | Chronic Gastritis |
| Anzhong pills                 | Chronic Gastritis          | Weiyouxin pills             | Chronic Gastritis |
| Bilingweitong particles       | Chronic Gastritis          | Wenwei jiangni particles    | Chronic Gastritis |
| Caoxiangweikang capsules      | Chronic Gastritis          | Xueshanweibao pellets       | Chronic Gastritis |
| Chenxiang lubailu pills       | Chronic Gastritis          | Yangweishu capsules         | Chronic Gastritis |
| Zhenhuang wei pills           | Chronic Gastritis          | Yiwei oral liquid           | Chronic Gastritis |
